# Supplementary material
Source: publisher figshare collection journal article supplement (https://diabetesjournals.figshare.com/ndownloader/files/31259458)
Supplement: Supplementary file 1 [file 31259458]

## Supplementary appendix

Association of Bariatric Surgery with Cancer Incidence in Patients with Obesity and Diabetes- Long-term results from the Swedish Obese Subjects study

Kajsa Sjöholm, Lena MS Carlsson, Per-Arne Svensson, et al

| <b>Table of contents</b>                                                                                                                   | <b>Page</b> |
|--------------------------------------------------------------------------------------------------------------------------------------------|-------------|
| Swedish Obese Subjects Study - Design and Recruitment                                                                                      | 2           |
| sTable 1. International Classification of Diseases (ICD) codes for cancer events                                                           | 3           |
| sTable 2. Number of first-time cancer events in patients with obesity and diabetes, by treatment                                           | 6           |
| sTable 3. Incidence of cancer, risk factor treatment interaction analyses and number needed to treat                                       | 7           |
| sTable 4. Multivariable Cox proportional hazards models for incident cancer, by sex                                                        | 8           |
| sTable 5. Multivariable Cox proportional hazards model for incident cancer in the surgery group, adjusted for degree of 1-year weight loss | 8           |
| sTable 6. Univariable and multivariable Cox proportional hazards models for incident obesity-related cancers                               | 9           |
| sFigure 1. Changes in body mass index over 20 years in controls and surgery patients with obesity and diabetes                             | 10          |
| sFigure 2. Cumulative incidence of cancer in patients with obesity and diabetes, stratified by sex                                         | 11          |
| sFigure 3. Cumulative incidence of cancer stratified by baseline diabetes duration                                                         | 12          |
| sFigure 4. Cumulative incidence of obesity-related cancer in patients with obesity and diabetes, stratified by sex                         | 13          |

## Swedish Obese Subjects - Study Design and Recruitment

Recruitment campaigns in the mass media and at 480 primary health-care centers were undertaken to identify individuals with obesity who were interested in participating a weight loss intervention study. A matching examination was completed by a total of 6905 patients, 5335 of which were found to be eligible. Among them, 2010 individuals electing surgery constituted the surgery group, and a contemporaneously matched control group of 2037 individuals was created using 18 matching variables (recruited between September 1, 1987, and January 31, 2001). The matching variables were sex, age, weight, height, waist and hip circumferences, systolic blood pressure, serum cholesterol and triglyceride levels, smoking status, diabetes, menopausal status, four psychosocial variables with documented associations with the risk of death, and two personality traits related to treatment preferences. A matching algorithm according to the method of sequential treatment assignment (Pocock SJ, Simon R). Sequential treatment assignment with balancing for prognostic factors in the controlled clinical trial. *Biometrics* 1975;31:103-15) was used to select controls so that the current mean values of the matching variables in the control group became as similar as possible to the current mean values in the surgery group. All participants were eligible for surgery, and both inclusion and exclusion criteria were identical for the two study groups. The inclusion criteria were aged 37 to 60 years and BMI of 34 kg/m<sup>2</sup> or more for men and 38 kg/m<sup>2</sup> or more for women before or at the matching examination. The BMI cut-offs corresponded to an approximate doubling in the rate of death in men and women (Waalder HT: *Acta Med Scand Suppl* 1984;679:1-56). The exclusion criteria were earlier surgery for gastric or duodenal ulcer, earlier bariatric surgery, gastric ulcer during the past 6 months, ongoing malignancy, active malignancy during the past 5 years, myocardial infarction during the past 6 months, drug or alcohol abuse, bulimic eating pattern, psychiatric or cooperative problems contraindicating bariatric surgery, other contraindicating conditions (such as chronic glucocorticoid or anti-inflammatory treatment). The intervention began on the day of surgery for subjects in the surgery group and for their matched controls. The type of surgery was determined by surgeons at the participating surgical departments. Surgery and control participants underwent a baseline examination approximately 4 weeks before the start of the intervention. Thereafter, clinical examinations were performed and questionnaires were completed after 0.5, 1, 2, 3, 4, 6, 8, 10, 15, and 20 years. Centralized biochemical analyses were performed at matching and baseline examinations and after 2, 10, 15, and 20 years, at the Central Laboratory, Sahlgrenska University Hospital, Gothenburg, Sweden, accredited according to International Organization for Standardization (ISO) 15189:2007 standards. During the course of the study, insulin was measured in serum using a radioimmunoassay (years 1987-2002) or a chemiluminescence assay (from year 2003). To be able to compare measurements before and after the method change, the Central Laboratory at Sahlgrenska University Hospital evaluated and confirmed the following conversion equation to be used for samples measured from 2003 onwards: adjusted insulin value = (measured insulin value + 2.6718) / 1.148. HbA1c levels for all time points were analyzed simultaneously at the St. Vincent's Healthcare Group, Dublin, Ireland, accredited by the Irish National Accreditation Board (registration number: 192MT in compliance with ISO/IEC 15189:2012).

sTable 1. International Classification of Diseases (ICD) codes for cancer events

| ICD-7 codes <sup>a</sup> | All cancers                                                                                                      | Obesity-related                                                                                        |
|--------------------------|------------------------------------------------------------------------------------------------------------------|--------------------------------------------------------------------------------------------------------|
| <b>Cancer</b>            |                                                                                                                  |                                                                                                        |
| Colorectal               | 1530<br>1531<br>1532<br>1533<br>1534<br>1539<br>1540                                                             | 1530<br>1531<br>1532<br>1533<br>1534<br>1539<br>1540                                                   |
| Female                   | 1701<br>1702<br>1707<br>1708<br>171<br>172<br>174<br>1750                                                        | 1701 <sup>b</sup><br>1702 <sup>b</sup><br>1707 <sup>b</sup><br>1708 <sup>b</sup><br>172<br>174<br>1750 |
| Haematopoietic           | 2001<br>2002<br>2003<br>201<br>2022<br>203<br>2040<br>2041<br>2049<br>2050<br>2051<br>2059<br>2079<br>208<br>209 | 203 <sup>c</sup>                                                                                       |
| Kidney                   | 1800<br>1809                                                                                                     | 1800<br>1809                                                                                           |
| Liver                    | 1550<br>156                                                                                                      | 1550<br>156                                                                                            |

|                    |                                                                                                                                                    |                                                                                          |
|--------------------|----------------------------------------------------------------------------------------------------------------------------------------------------|------------------------------------------------------------------------------------------|
| Lung and bronchial | 1621                                                                                                                                               |                                                                                          |
| Malignant skin     | 1902<br>1903<br>1904<br>1905<br>1906<br>1907<br>1909<br>1912<br>1913<br>1914<br>1915<br>1916<br>1917<br>1919                                       |                                                                                          |
| Pancreas           | 157                                                                                                                                                | 157                                                                                      |
| Prostate           | 177                                                                                                                                                |                                                                                          |
| Urothelial         | 1801<br>1810<br>1812                                                                                                                               |                                                                                          |
| Other              | 1400<br>1401<br>1409<br>1417<br>1419<br>1420<br>144<br>1450<br>1500<br>1510<br>1511<br>1519<br>1520<br>1529<br>1551<br>1552<br>1559<br>158<br>1600 | 1500 <sup>d</sup><br>1510<br>1511<br>1519<br>1551<br>1552<br>1559<br>1930<br>1931<br>194 |

|  |      |  |
|--|------|--|
|  | 161  |  |
|  | 1622 |  |
|  | 173  |  |
|  | 1751 |  |
|  | 1760 |  |
|  | 1761 |  |
|  | 1767 |  |
|  | 1769 |  |
|  | 178  |  |
|  | 1790 |  |
|  | 1920 |  |
|  | 1930 |  |
|  | 1931 |  |
|  | 194  |  |
|  | 1950 |  |
|  | 1953 |  |
|  | 1959 |  |
|  | 1963 |  |
|  | 1967 |  |
|  | 1977 |  |
|  | 1979 |  |
|  | 1993 |  |
|  | 1994 |  |
|  | 1999 |  |

<sup>a</sup>Note that the listed codes are exclusive to those registered for patients in the SOS study.

<sup>b</sup>Age  $\geq$ 55 years

<sup>c</sup>Only events corresponding to code ICD-10: C90.0X

<sup>d</sup>Morfological code=096

sTable 2. Number of first-time cancer events by treatment

| <b>Cancer</b>      | <b>Control</b> | <b>Surgery</b> |
|--------------------|----------------|----------------|
| Colorectal         | 10             | 12             |
| Female             | 23             | 18             |
| Haematopoietic     | 3              | 3              |
| Kidney             | 1              | 3              |
| Liver              | 4              | 3              |
| Lung and bronchial | 4              | 5              |
| Malignant skin     | 6              | 3              |
| Pancreas           | 2              | 4              |
| Prostate           | 7              | 2              |
| Urothelial         | 4              | 2              |
| Other              | 10             | 13             |
|                    |                |                |
| <b>Total</b>       | <b>74</b>      | <b>68</b>      |

sTable 3. Incidence of cancer, risk factor treatment interaction analyses and number needed to treat

|                             |        | Surgery |        |                                   | Control |        |                                   | Log-rank p | Relative treatment effects |       |                          | NNT |
|-----------------------------|--------|---------|--------|-----------------------------------|---------|--------|-----------------------------------|------------|----------------------------|-------|--------------------------|-----|
|                             |        | N       | Events | IR per 1000 person-years (95% CI) | N       | Events | IR per 1000 person-years (95% CI) |            | HR (95% CI)                | HR p  | Interaction p (adjusted) |     |
| TOTAL                       | All    | 393     | 68     | 9.1 (7.2-11.5)                    | 308     | 74     | 14.1 (11.2-17.7)                  |            | 0.60 (0.43-0.84)           | 0.003 |                          | 20  |
| Sex                         | Woman  | 236     | 41     | 8.8 (6.5-12.0)                    | 182     | 45     | 14.4 (10.8-19.3)                  |            | 0.57 (0.38-0.88)           | 0.010 | 0.630                    | 18  |
|                             | Man    | 157     | 27     | 9.5 (6.5-13.9)                    | 126     | 29     | 13.6 (9.4-19.5)                   | 0.875      | 0.66 (0.39-1.11)           | 0.117 |                          | 25  |
| Smoking                     | No     | 292     | 48     | 8.4 (6.3-11.1)                    | 236     | 57     | 13.8 (10.7-17.9)                  |            | 0.56 (0.38-0.83)           | 0.004 | 0.599                    | 18  |
|                             | Yes    | 100     | 20     | 11.6 (7.5-18.0)                   | 67      | 17     | 16.5 (10.2-26.5)                  | 0.511      | 0.67 (0.35-1.26)           | 0.212 |                          | 21  |
| Age (years)                 | <49.9  | 210     | 27     | 6.4 (4.4-9.3)                     | 141     | 24     | 9.3 (6.2-13.9)                    |            | 0.63 (0.36-1.09)           | 0.100 | 0.382                    | 34  |
|                             | >49.9  | 183     | 41     | 12.6 (9.3-17.1)                   | 167     | 50     | 18.7 (14.2-24.7)                  | 0.002      | 0.65 (0.43-0.97)           | 0.037 |                          | 16  |
| Alcohol consumption (g/day) | <1.78  | 195     | 34     | 9.1 (6.5-12.8)                    | 156     | 39     | 14.8 (10.8-20.2)                  |            | 0.58 (0.37-0.92)           | 0.022 | 0.804                    | 18  |
|                             | >1.78  | 198     | 34     | 9.1 (6.5-12.7)                    | 152     | 35     | 13.4 (9.6-18.6)                   | 0.660      | 0.63 (0.39-1.01)           | 0.056 |                          | 23  |
| Sagittal diameter (cm)      | <29    | 183     | 27     | 7.5 (5.2-11.0)                    | 194     | 48     | 14.0 (10.6-18.6)                  |            | 0.50 (0.31-0.80)           | 0.004 | 0.186                    | 15  |
|                             | >29    | 208     | 41     | 10.7 (7.9-14.5)                   | 114     | 26     | 14.2 (9.7-20.9)                   | 0.782      | 0.70 (0.43-1.14)           | 0.154 |                          | 28  |
| Serum insulin (pmol/L)      | <140.4 | 171     | 23     | 7.1 (4.7-10.7)                    | 177     | 38     | 12.3 (9.0-17.0)                   |            | 0.56 (0.33-0.94)           | 0.029 | 0.392                    | 19  |
|                             | >140.4 | 217     | 44     | 10.6 (7.9-14.3)                   | 130     | 36     | 16.6 (12.0-23.0)                  | 0.163      | 0.58 (0.37-0.90)           | 0.016 |                          | 17  |
| University education        | No     | 347     | 63     | 9.5 (7.4-12.2)                    | 254     | 59     | 13.8 (10.7-17.9)                  |            | 0.64 (0.45-0.91)           | 0.014 | 0.267                    | 23  |
|                             | Yes    | 46      | 5      | 5.8 (2.4-14.0)                    | 54      | 15     | 15.1 (9.1-25.1)                   | 0.930      | 0.38 (0.14-1.02)           | 0.054 |                          | 11  |
| Blood glucose (mmol/L)      | <7.3   | 197     | 29     | 7.5 (5.2-10.8)                    | 154     | 42     | 15.3 (11.3-20.7)                  |            | 0.47 (0.29-0.75)           | 0.002 | 0.748                    | 13  |
|                             | >7.3   | 195     | 39     | 10.8 (7.9-14.8)                   | 154     | 32     | 12.7 (9.0-18.0)                   | 0.634      | 0.78 (0.49-1.25)           | 0.305 |                          | 52  |
| HbA1c (mmol/mol)            | <56.7  | 182     | 30     | 8.5 (5.9-12.1)                    | 143     | 37     | 15.0 (10.9-20.7)                  |            | 0.53 (0.33-0.86)           | 0.010 | 0.934                    | 15  |
|                             | >56.7  | 185     | 32     | 9.2 (6.5-13.0)                    | 139     | 29     | 12.7 (8.8-18.3)                   | 0.602      | 0.66 (0.40-1.10)           | 0.109 |                          | 29  |
| HOMA-IR                     | <8.9   | 165     | 25     | 7.8 (5.3-11.5)                    | 182     | 39     | 11.9 (8.7-16.3)                   |            | 0.64 (0.39-1.06)           | 0.080 | 0.826                    | 24  |
|                             | >8.9   | 222     | 42     | 10.1 (7.5-13.7)                   | 125     | 35     | 17.7 (12.7-24.7)                  | 0.035      | 0.50 (0.32-0.79)           | 0.003 |                          | 13  |

IR, incidence rate; HR, hazard ratio; NNT, number needed to treat. Interaction p adjusted for sex, age, education, alcohol consumption, smoking, sagittal diameter and serum insulin.

sTable 4. Multivariable Cox proportional hazards models for incident cancer, by sex

|                             | Women             |       | Men              |        |
|-----------------------------|-------------------|-------|------------------|--------|
|                             | HR (95% CI)       | p     | HR (95% CI)      | p      |
| Surgery (yes vs no)         | 0.58 (0.38-0.90)  | 0.016 | 0.79 (0.46-1.38) | 0.413  |
| Age (years)                 | 1.06 (1.02-1.10)  | 0.003 | 1.11 (1.06-1.16) | <0.001 |
| Alcohol consumption (g/day) | 0.97 (0.91-1.02)  | 0.276 | 1.02 (0.99-1.05) | 0.186  |
| Daily smoking (yes vs no)   | 1.42 (0.83-2.43)  | 0.197 | 1.54 (0.88-2.71) | 0.130  |
| Sagittal diameter (cm)      | 1.08 (1.01-1.15)  | 0.027 | 1.01 (0.93-1.09) | 0.897  |
| Serum insulin (pmol/L)      | 1.00 (0.99-1.01)) | 0.479 | 1.01 (1.00-1.02) | 0.192  |
| University education        | 1.01 (0.60-1.72)  | 0.966 | 0.71 (0.28-1.81) | 0.470  |

Hazard ratios (HR) are expressed as “men vs women” etc. for dichotomous variables, and per unit for continuous variables. Men coded as 1, women as 0. Yes coded as 1, no coded as 0

sTable 5. Multivariable Cox proportional hazards model for incident cancer in the surgery group, adjusted for degree of weight loss

|                                                          | HR (95% CI)      | p      |
|----------------------------------------------------------|------------------|--------|
| Weight loss (1 <sup>st</sup> vs 3 <sup>rd</sup> tertile) | 0.58 (0.30-1.12) | 0.102  |
| Weight loss (2 <sup>nd</sup> vs 3 <sup>rd</sup> tertile) | 0.83 (0.45-1.51) | 0.532  |
| Age (years)                                              | 1.08 (1.04-1.13) | <0.001 |
| Sex (men vs women)                                       | 0.97 (0.55-1.72) | 0.929  |
| Alcohol consumption (g/day)                              | 0.99 (0.96-1.03) | 0.781  |
| Daily smoking (yes vs no)                                | 1.88 (1.08-3.26) | 0.025  |
| Sagittal diameter (cm)                                   | 1.11 (1.03-1.19) | 0.005  |
| Serum insulin (pmol/L)                                   | 1.00 (0.99-1.01) | 0.907  |
| University education                                     | 0.54 (0.21-1.37) | 0.193  |

Hazard ratios (HR) are expressed as “men vs women” etc. for dichotomous variables, and per unit for continuous variables. Men coded as 1, women as 0. Yes coded as 1, no coded as 0. Mean weight loss at 1 year; 1<sup>st</sup> tertile, -44.8 kg; 2<sup>nd</sup> tertile, -27.1 kg; 3<sup>rd</sup> tertile, -14.9 kg.



sTable 6. Univariable and multivariable Cox proportional hazards models for incident obesity-related cancer

|                             | Univariable      |       | Multivariable    |       |
|-----------------------------|------------------|-------|------------------|-------|
|                             | HR (95% CI)      | p     | HR (95% CI)      | p     |
| Surgery (yes vs no)         | 0.74 (0.48-1.13) | 0.158 | 0.77 (0.49-1.20) | 0.249 |
| Age (years)                 | 1.05 (1.02-1.09) | 0.003 | 1.05 (1.01-1.09) | 0.006 |
| Sex (men vs women)          | 0.70 (0.45-1.11) | 0.129 | 0.63 (0.38-1.06) | 0.083 |
| Alcohol consumption (g/day) | 0.99 (0.96-1.02) | 0.659 | 1.01 (0.98-1.04) | 0.700 |
| Daily smoking (yes vs no)   | 0.86 (0.51-1.45) | 0.560 | 0.92 (0.54-1.56) | 0.753 |
| Sagittal diameter (cm)      | 0.99 (0.93-1.06) | 0.858 | 1.02 (0.95-1.09) | 0.626 |
| Serum insulin (pmol/L)      | 1.00 (0.99-1.01) | 0.537 | 1.01 (1.00-1.01) | 0.143 |
| University education        | 1.12 (0.62-2.03) | 0.713 | 1.04 (0.59-1.86) | 0.884 |

Hazard ratios (HR) are expressed as “men vs women” etc. for dichotomous variables, and per unit for continuous variables. Men coded as 1, women as 0. Yes coded as 1, no coded as 0.

Figure 1. Changes in body mass index over 20 years in controls and surgery patients with obesity and diabetes

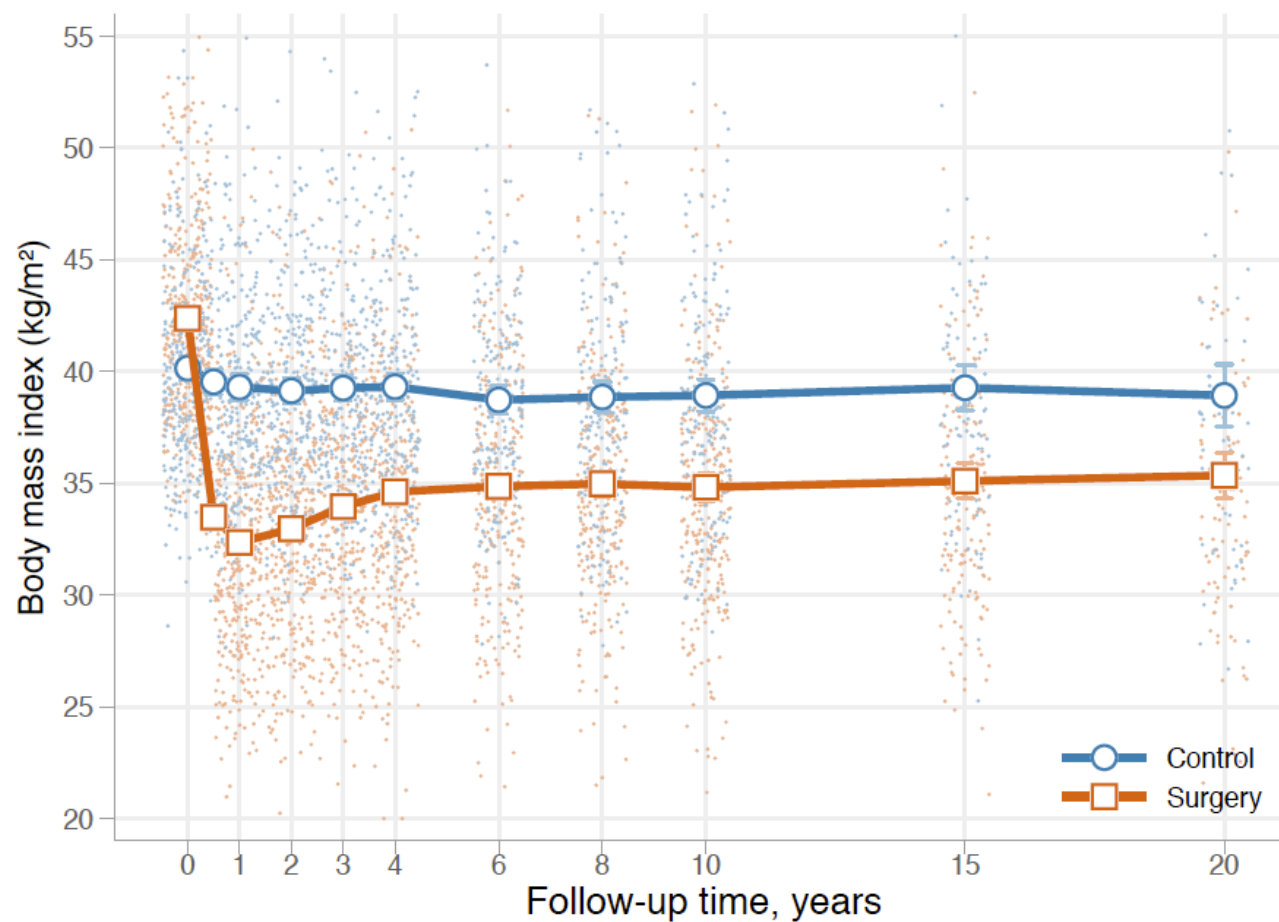

Lines are estimated means from a mixed model with adjustment for sex and age. Dots represent observed values from individual participants. The y axis is truncated at a body-mass index of 20 and of 55 kg/m<sup>2</sup>, but all observations were used in the estimation of means.

sFigure 2. Cumulative incidence of cancer in patients with obesity and diabetes, stratified by sex

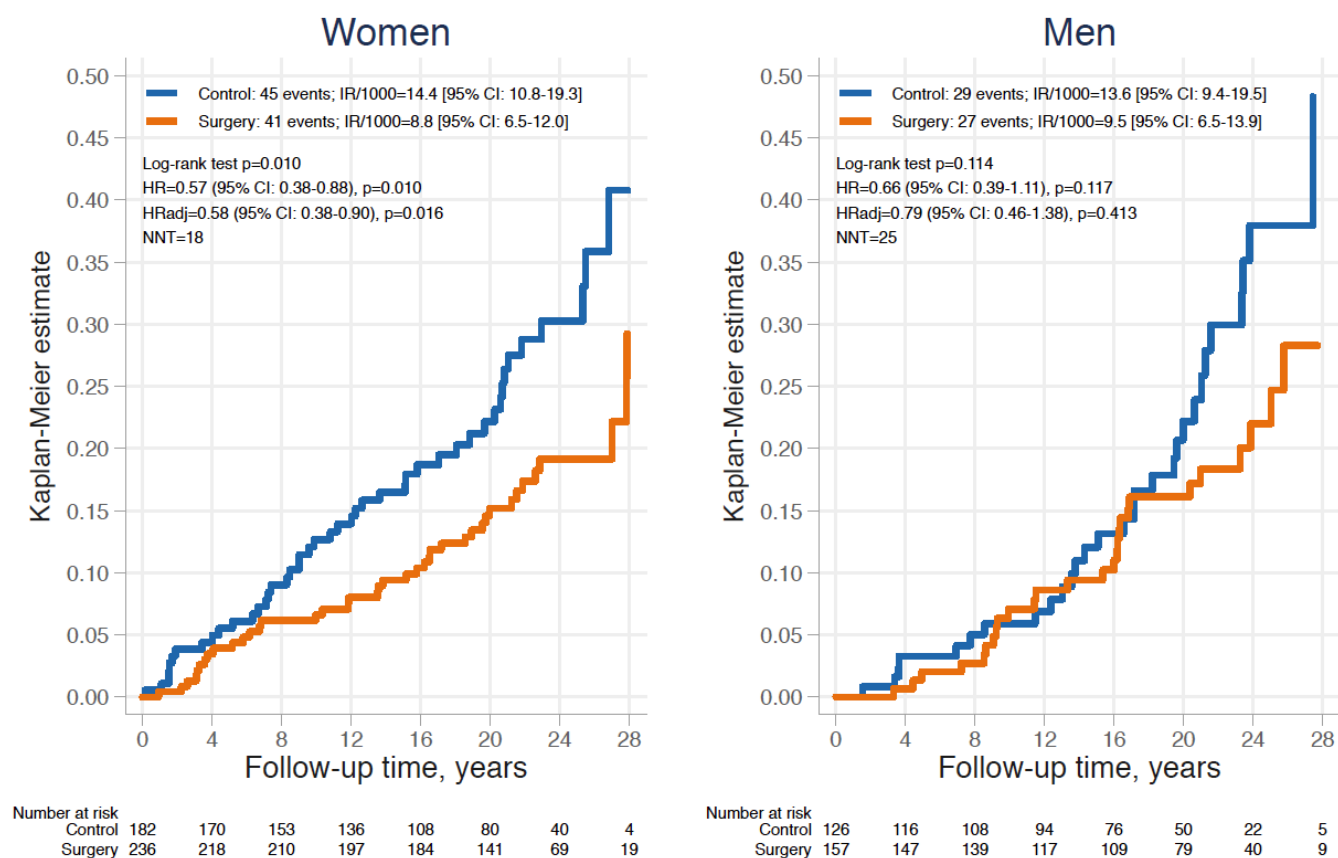

IR, incidence rate; HR=hazard ratio; HRadj=adjusted hazard ratio; NNT, numbers needed to treat.  
 Adjusted for age, education, alcohol consumption, smoking, sagittal diameter and serum insulin.

sFigure 3. Cumulative incidence of cancer stratified by baseline diabetes duration

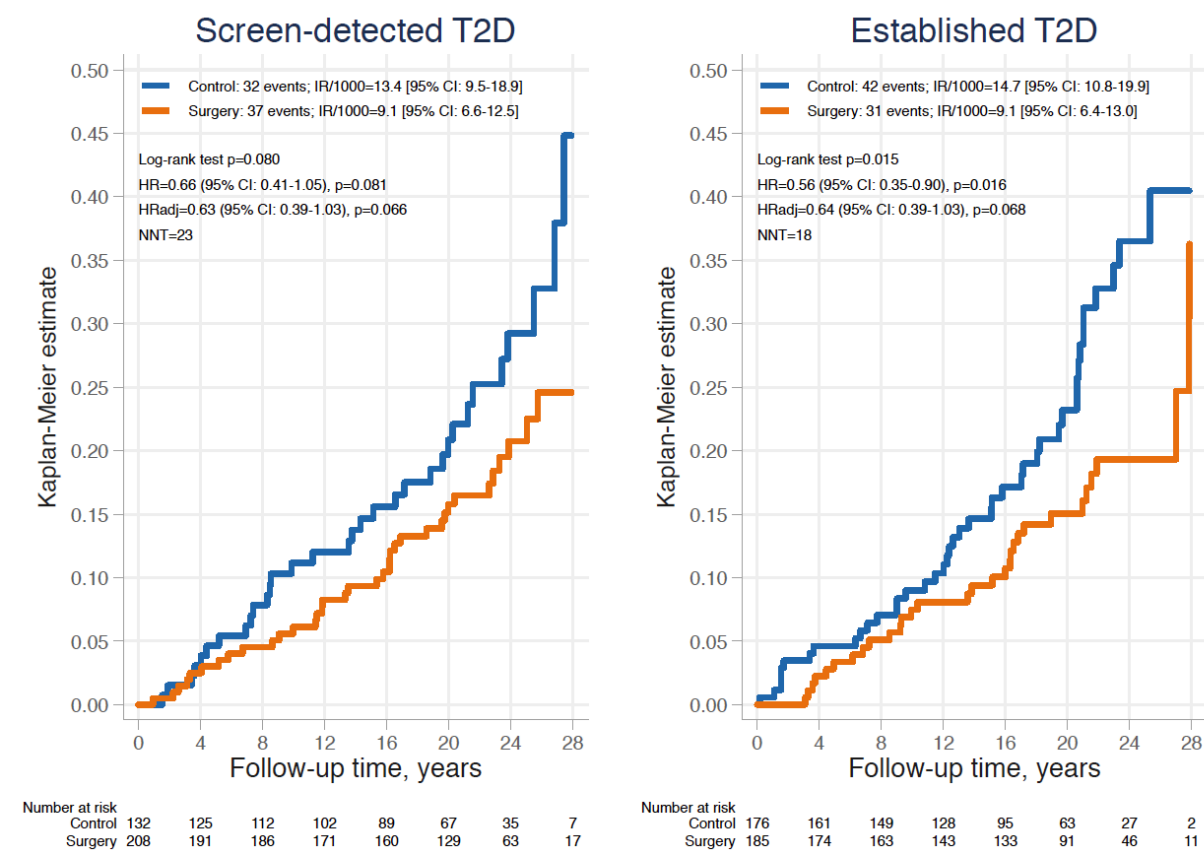

T2D, type 2 diabetes; IR, incidence rate; HR=hazard ratio; HRadj=adjusted hazard ratio; NNT, numbers needed to treat. Adjusted for age, education, alcohol consumption, smoking, sagittal diameter and serum insulin.

sFigure 4. Cumulative incidence of obesity-related cancer in patients with obesity and diabetes, stratified by sex

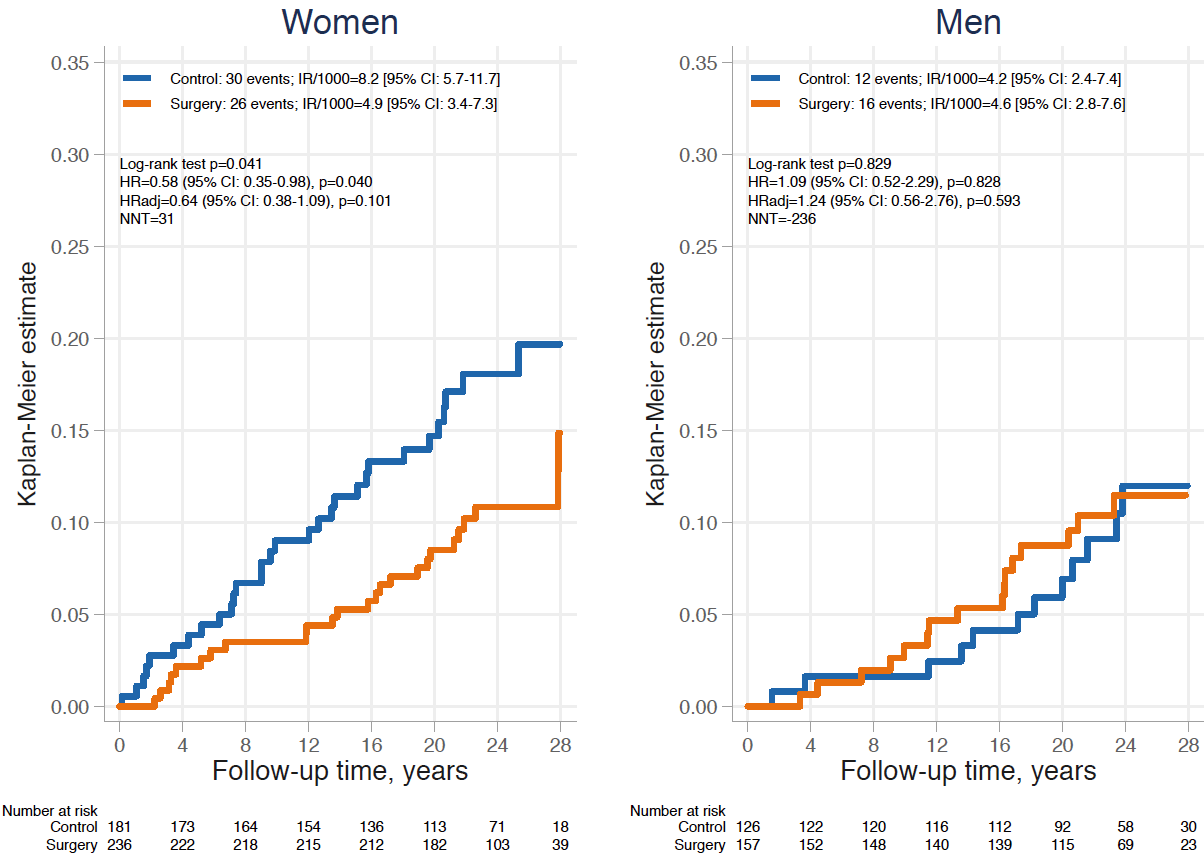

IR, incidence rate; HR=hazard ratio; HRadj=adjusted hazard ratio; NNT, numbers needed to treat.  
Adjusted for age, education, alcohol consumption, smoking, sagittal diameter and serum insulin.
